# Supplementary material
Source: MDPI journal article supplement (https://www.mdpi.com/1996-1073/14/19/6336)
Supplement: s1 [file s1]

# Forecasting the CO<sub>2</sub> Emissions at the Global Level: A Multilayer Artificial Neural Network Modelling – Supplementary Materials

Pradyot Ranjan Jena 1,\* , Shunsuke Managi 2 and Babita Majhi 3

<sup>1</sup> School of Management, National Institute of Technology Karnataka, Surathkal, Mangalore, 575025, India

<sup>2</sup> Urban Institute & Department of Civil Engineering, Kyushu University, Fukuoka, Japan;

managi.s@gmail.com

<sup>3</sup> Department of CSIT, Guru Ghasidas Vishwavidyalaya, Central University, Bilaspur, India; babita.majhi@gmail.com

\* Correspondence: pradyotjena@nitk.edu.in

**Table S1.** Simulation results based on different combination of hidden layer and neuron.

| ANN structure              | Name of country | Training time<br>(in sec) | Testing time<br>(in sec) | MSE in training | MAPE value<br>during testing(%) |
|----------------------------|-----------------|---------------------------|--------------------------|-----------------|---------------------------------|
| 1hidden 5 neurons          | India           | 6.138478                  | 0.009161                 | 2.3232e-04      | 4.0062                          |
| 1hidden 6neurons           |                 | 6.216188                  | 0.009189                 | 3.5767e-04      | 5.3370                          |
| 1hidden 7neurons           |                 | 6.123864                  | 0.009349                 | 2.9401e-04      | 4.2950                          |
| 1hidden 8 neurons          |                 | 6.269911                  | 0.008752                 | 3.0132e-04      | 4.1285                          |
| 1 hidden 9 neurons         |                 | 10.028355                 | 0.010354                 | 3.5327e-04      | 3.5209                          |
| 2hidden 7 and<br>2neurons  |                 | 9.831674                  | 0.009441                 | 3.4736e-04      | 4.1261                          |
| 2hidden 8 and 3<br>neurons |                 | 10.636431                 | 0.009528                 | 3.4793e-04      | 3.8685                          |
| 2hidden 9 an<br>3neurons   |                 | 9.585224                  | 0.009823                 | 3.1842e-04      | <b>2.9287</b>                   |
| 2hidden 9 and<br>4neurons  |                 | 9.871772                  | 0.010052                 | 2.0343e-04      | 3.1180                          |
| 1hidden 5 neurons          | China           | 6.110742                  | 0.009158                 | 4.5298e-04      | 2.5947                          |
| 1hidden 6neurons           |                 | 6.089258                  | 0.009196                 | 5.7419e-04      | 3.4048                          |
| 1hidden 7neurons           |                 | 6.322200                  | 0.009140                 | 6.7688e-04      | 3.6029                          |
| 1hidden 8 neurons          |                 | 6.152000                  | 0.008976                 | 5.0920e-04      | 3.1887                          |
| 1 hidden 9 neurons         |                 | 6.229867                  | 0.009011                 | 4.8202e-04      | 3.7016                          |
| 2hidden 7 and<br>2neurons  |                 | 9.389856                  | 0.010075                 | 4.3010e-04      | 1.9431                          |
| 2hidden 8 and 3<br>neurons |                 | 10.057381                 | 0.009753                 | 3.0071e-04      | 1.9622                          |
| 2hidden 9 an<br>3neurons   |                 | 9.766929                  | 0.009766                 | 3.9001e-04      | <b>1.7896</b>                   |
| 2hidden 9 and<br>4neurons  |                 | 9.975999                  | 0.009455                 | 4.2449e-04      | 2.9416                          |
| 1hidden 5 neurons          | Iran            | 6.913849                  | 0.009312                 | 5.7841e-04      | 4.6391                          |
| 1hidden 6neurons           |                 | 6.887546                  | 0.009127                 | 7.1798e-04      | 4.3433                          |

|                         |             |           |          |            |               |
|-------------------------|-------------|-----------|----------|------------|---------------|
|                         |             |           |          |            |               |
| 1hidden 7neurons        |             | 7.074856  | 0.012755 | 7.9437e-04 | 4.3276        |
| 1hidden 8 neurons       |             | 7.192900  | 0.009457 | 5.7418e-04 | 4.6925        |
| 1 hidden 9 neurons      |             | 7.899810  | 0.012146 | 7.8194e-04 | 4.5488        |
| 2hidden 7 and 2neurons  |             | 9.371471  | 0.010794 | 4.0064e-04 | 2.9805        |
| 2hidden 8 and 3 neurons |             | 9.362102  | 0.009566 | 6.9403e-04 | 2.9686        |
| 2hidden 9 an 3neurons   |             | 9.417953  | 0.009692 | 4.1715e-04 | <b>2.3610</b> |
| 2hidden 9 and 4neurons  |             | 9.448383  | 0.009704 | 6.3174e-04 | 3.4062        |
| 1hidden 5 neurons       | South Korea | 5.754868  | 0.008696 | 4.9800e-04 | 4.7633        |
| 1hidden 6neurons        |             | 5.861521  | 0.008901 | 6.7324e-04 | 3.4051        |
| 1hidden 7neurons        |             | 5.823516  | 0.008789 | 4.4774e-04 | 4.9455        |
| 1hidden 8 neurons       |             | 5.971879  | 0.008950 | 3.6985e-04 | 4.5893        |
| 1 hidden 9 neurons      |             | 6.232529  | 0.008714 | 4.4659e-04 | 5.4749        |
| 2hidden 7 and 2neurons  |             | 7.720223  | 0.009725 | 4.7267e-04 | 4.0795        |
| 2hidden 8 and 3 neurons |             | 9.150815  | 0.009356 | 3.3289e-04 | 2.7722        |
| 2hidden 9 an 3neurons   |             | 9.241007  | 0.009807 | 6.5473e-04 | <b>2.4803</b> |
| 2hidden 9 and 4neurons  |             | 9.401891  | 0.010197 | 4.4097e-04 | 3.3424        |
| 1hidden 5 neurons       | Canada      | 5.868935  | 0.008757 | 0.0011     | 3.8649        |
| 1hidden 6neurons        |             | 5.918079  | 0.009310 | 0.0011     | 3.2082        |
| 1hidden 7neurons        |             | 6.007617  | 0.009096 | 0.0011     | 3.9209        |
| 1hidden 8 neurons       |             | 5.918384  | 0.008888 | 0.0011     | 3.9862        |
| 1 hidden 9 neurons      |             | 5.953414  | 0.008799 | 0.0014     | 3.9108        |
| 2hidden 7 and 2neurons  |             | 7.749690  | 0.009708 | 6.0841e-04 | 4.3843        |
| 2hidden 8 and 3 neurons |             | 7.810109  | 0.009941 | 0.0011     | 3.7945        |
| 2hidden 9 an 3neurons   |             | 8.126898  | 0.009525 | 7.2345e-04 | <b>2.9358</b> |
| 2hidden 9 and 4neurons  |             | 7.769944  | 0.009471 | 0.0012     | 3.9124        |
| 1hidden 5 neurons       | Indonesia   | 5.935187  | 0.009459 | 0.0012     | 9.7618        |
| 1hidden 6neurons        |             | 5.890987  | 0.008772 | 9.3132e-04 | 9.8918        |
| 1hidden 7neurons        |             | 6.029074  | 0.009080 | 0.0019     | 10.5051       |
| 1hidden 8 neurons       |             | 5.919254  | 0.011954 | 0.0023     | 10.3466       |
| 1 hidden 9 neurons      |             | 5.993429  | 0.008863 | 5.1598e-04 | 10.8022       |
| 2hidden 7 and 2neurons  |             | 11.321229 | 0.009985 | 0.0020     | 9.8449        |
| 2hidden 8 and 3 neurons |             | 8.231340  | 0.009959 | 0.0013     | 9.8369        |
| 2hidden 9 an 3neurons   |             | 11.567121 | 0.015924 | 3.6109e-04 | <b>9.6898</b> |
| 2hidden 9 and 4neurons  |             | 11.907859 | 0.009690 | 7.9649e-04 | 9.9591        |

|                         |              |           |          |            |               |
|-------------------------|--------------|-----------|----------|------------|---------------|
|                         |              |           |          |            |               |
| 1hidden 5 neurons       | Brazil       | 5.963350  | 0.009413 | 0.0012     | 6.4509        |
| 1hidden 6neurons        |              | 5.937830  | 0.009012 | 0.0015     | 6.4964        |
| 1hidden 7neurons        |              | 5.991229  | 0.009164 | 0.0012     | 6.0184        |
| 1hidden 8 neurons       |              | 6.132805  | 0.009207 | 0.0011     | 6.2771        |
| 1 hidden 9 neurons      |              | 6.088682  | 0.009066 | 0.0012     | 6.3698        |
| 2hidden 7 and 2neurons  |              | 11.303435 | 0.009937 | 7.5015e-04 | 6.0302        |
| 2hidden 8 and 3 neurons |              | 9.845643  | 0.009931 | 0.0014     | 6.1265        |
| 2hidden 9 an 3neurons   |              | 10.382500 | 0.010050 | 9.2622e-04 | <b>5.3345</b> |
| 2hidden 9 and 4neurons  |              | 11.795995 | 0.01019  | 0.0012     | 6.1943        |
| 1hidden 5 neurons       | South Africa | 5.850833  | 0.009198 | 0.0015     | 2.9419        |
| 1hidden 6neurons        |              | 5.919399  | 0.009238 | 0.0012     | 2.8948        |
| 1hidden 7neurons        |              | 5.884500  | 0.009034 | 0.0011     | 2.8201        |
| 1hidden 8 neurons       |              | 6.110328  | 0.009050 | 0.0015     | 3.4969        |
| 1 hidden 9 neurons      |              | 6.018903  | 0.008584 | 0.0017     | 3.5420        |
| 2hidden 7 and 2neurons  |              | 8.343964  | 0.009915 | 6.9560e-04 | 2.9090        |
| 2hidden 8 and 3 neurons |              | 10.166757 | 0.009720 | 0.0011     | 2.8282        |
| 2hidden 9 an 3neurons   |              | 9.733629  | 0.009733 | 6.1091e-04 | <b>2.7524</b> |
| 2hidden 9 and 4neurons  |              | 9.618706  | 0.009444 | 9.5343e-04 | 2.7581        |
| 1hidden 5 neurons       | Mexico       | 5.858096  | 0.009000 | 0.0014     | 3.6678        |
| 1hidden 6neurons        |              | 5.888978  | 0.009337 | 7.0457e-04 | 2.3329        |
| 1hidden 7neurons        |              | 5.943035  | 0.008922 | 0.0011     | 2.5249        |
| 1hidden 8 neurons       |              | 5.925326  | 0.009325 | 6.9130e-04 | 2.1518        |
| 1 hidden 9 neurons      |              | 6.064403  | 0.008917 | 9.5070e-04 | 4.4129        |
| 2hidden 7 and 2neurons  |              | 9.329162  | 0.009422 | 5.5520e-04 | 2.0929        |
| 2hidden 8 and 3 neurons |              | 9.155506  | 0.009456 | 4.5116e-04 | 2.0402        |
| 2hidden 9 an 3neurons   |              | 9.758929  | 0.009660 | 1.6016e-04 | <b>1.9266</b> |
| 2hidden 9 and 4neurons  |              | 9.605513  | 0.012369 | 8.4504e-04 | 2.5691        |
| 1hidden 5 neurons       | Turkey       | 6.054959  | 0.008867 | 2.4340e-04 | 2.9384        |
| 1hidden 6neurons        |              | 6.178992  | 0.009523 | 3.0232e-04 | 2.3227        |
| 1hidden 7neurons        |              | 5.896868  | 0.008963 | 1.1582e-04 | 2.3548        |
| 1hidden 8 neurons       |              | 5.935108  | 0.009247 | 2.7431e-04 | 3.3400        |
| 1 hidden 9 neurons      |              | 6.066213  | 0.009055 | 3.7015e-04 | 2.3665        |
| 2hidden 7 and 2neurons  |              | 9.323097  | 0.009191 | 2.7164e-04 | 2.2197        |
| 2hidden 8 and 3 neurons |              | 9.258260  | 0.009341 | 1.5396e-04 | 2.8701        |
| 2hidden 9 an 3neurons   |              | 9.335503  | 0.009375 | 1.5836e-04 | <b>2.1538</b> |

|                            |           |          |          |            |               |
|----------------------------|-----------|----------|----------|------------|---------------|
| 2hidden 9 and<br>4neurons  | Australia | 9.484636 | 0.009525 | 1.7254e-04 | 2.8923        |
| 1hidden 5 neurons          |           | 5.912477 | 0.009287 | 4.0076e-04 | 3.8219        |
| 1hidden 6neurons           |           | 5.898434 | 0.009094 | 6.5776e-04 | 3.8112        |
| 1hidden 7neurons           |           | 6.059746 | 0.009049 | 5.9981e-04 | 3.6756        |
| 1hidden 8 neurons          |           | 6.188681 | 0.009060 | 6.6862e-04 | 3.6976        |
| 1 hidden 9 neurons         |           | 6.863421 | 0.009375 | 6.4721e-04 | 3.6512        |
| 2hidden 7 and<br>2neurons  |           | 9.219789 | 0.009911 | 5.0460e-04 | 3.6453        |
| 2hidden 8 and 3<br>neurons |           | 9.232531 | 0.009762 | 4.5971e-04 | 3.7155        |
| 2hidden 9 an<br>3neurons   |           | 9.363223 | 0.009914 | 5.5587e-04 | <b>3.4001</b> |
| 2hidden 9 and<br>4neurons  |           | 9.319407 | 0.009774 | 5.7673e-04 | 3.4514        |

**Table S2.** Data division during training phase for Group-1 countries.

| Sl. No. | Name of country | Ratio of data division | MAPE(in %) | RMSE   | MAE    |
|---------|-----------------|------------------------|------------|--------|--------|
| 1       | India           | 80-20%                 | 2.9287     | 0.0198 | 0.0235 |
|         |                 | 70-30%                 | 3.5062     | 0.0253 | 0.0214 |
|         |                 | 60-40%                 | 5.0285     | 0.0345 | 0.0284 |
| 2       | China           | 80-20%                 | 1.7896     | 0.0113 | 0.0150 |
|         |                 | 70-30%                 | 5.3518     | 0.0350 | 0.0288 |
|         |                 | 60-40%                 | 4.9046     | 0.0310 | 0.0263 |
| 3       | Iran            | 80-20%                 | 2.3610     | 0.0262 | 0.0277 |
|         |                 | 70-30%                 | 5.2414     | 0.0464 | 0.0399 |
|         |                 | 60-40%                 | 4.5314     | 0.0359 | 0.0302 |
| 4       | South Korea     | 80-20%                 | 2.4803     | 0.0244 | 0.0324 |
|         |                 | 70-30%                 | 4.0628     | 0.0422 | 0.0330 |
|         |                 | 60-40%                 | 4.3806     | 0.0400 | 0.0330 |
| 5       | Canada          | 80-20%                 | 2.9358     | 0.0244 | 0.0277 |
|         |                 | 70-30%                 | 3.5630     | 0.0433 | 0.0344 |
|         |                 | 60-40%                 | 4.0554     | 0.0423 | 0.0366 |
| 6       | Indonesia       | 80-20%                 | 9.6898     | 0.0767 | 0.1077 |
|         |                 | 70-30%                 | 7.4279     | 0.0852 | 0.0598 |
|         |                 | 60-40%                 | 6.9903     | 0.0838 | 0.0463 |
| 7       | USA             | 80-20%                 | 2.7168     | 0.0265 | 0.0308 |
|         |                 | 70-30%                 | 5.3612     | 0.0574 | 0.0490 |
|         |                 | 60-40%                 | 5.3558     | 0.0537 | 0.0507 |
| 8       | Japan           | 80-20%                 | 3.5206     | 0.0214 | 0.0264 |
|         |                 | 70-30%                 | 2.5840     | 0.0298 | 0.0244 |
|         |                 | 60-40%                 | 3.0422     | 0.0349 | 0.0293 |
| 9       | Saudi Arabia    | 80-20%                 | 5.9153     | 0.0462 | 0.0535 |
|         |                 | 70-30%                 | 6.4128     | 0.0550 | 0.0587 |
|         |                 | 60-40%                 | 10.1447    | 0.0688 | 0.0549 |

**Table S3.** Data division during training phase for Group-2 countries.

| Sl. No. | Name of country | Ratio of data division | MAPE(in %) | RMSE   | MAE    |
|---------|-----------------|------------------------|------------|--------|--------|
| 1       | Brazil          | 80-20%                 | 5.3345     | 0.0330 | 0.0412 |
|         |                 | 70-30%                 | 5.3642     | 0.0494 | 0.0414 |
|         |                 | 60-40%                 | 6.2348     | 0.0501 | 0.0422 |
| 2       | South Africa    | 80-20%                 | 2.7524     | 0.0279 | 0.0379 |
|         |                 | 70-30%                 | 5.6019     | 0.0541 | 0.0475 |
|         |                 | 60-40%                 | 3.6512     | 0.0372 | 0.0302 |
| 3       | Mexico          | 80-20%                 | 1.9266     | 0.0200 | 0.0224 |
|         |                 | 70-30%                 | 2.5660     | 0.0302 | 0.0232 |
|         |                 | 60-40%                 | 2.6386     | 0.0265 | 0.0227 |
| 4       | Turkey          | 80-20%                 | 2.1538     | 0.0162 | 0.0209 |
|         |                 | 70-30%                 | 2.7996     | 0.0233 | 0.0205 |
|         |                 | 60-40%                 | 2.2536     | 0.0217 | 0.0151 |
| 5       | Australia       | 80-20%                 | 3.4001     | 0.0367 | 0.0417 |
|         |                 | 70-30%                 | 3.1685     | 0.0337 | 0.0292 |
|         |                 | 60-40%                 | 4.5450     | 0.0422 | 0.0387 |
| 6       | UK              | 80-20%                 | 3.5419     | 0.0410 | 0.0502 |
|         |                 | 70-30%                 | 6.4151     | 0.0534 | 0.0470 |
|         |                 | 60-40%                 | 4.0331     | 0.0361 | 0.0304 |
| 7       | Italy           | 80-20%                 | 8.8015     | 0.0653 | 0.0769 |
|         |                 | 70-30%                 | 10.4971    | 0.1020 | 0.0869 |
|         |                 | 60-40%                 | 9.3649     | 0.0915 | 0.0820 |
| 8       | France          | 80-20%                 | 3.8158     | 0.0241 | 0.0333 |
|         |                 | 70-30%                 | 5.1282     | 0.0425 | 0.0335 |
|         |                 | 60-40%                 | 5.2287     | 0.0419 | 0.0354 |

**Table 4.** MAPE values for Group-I and Group-II countries using SVM with different kernels.

| Name of country | SVM-Linear | SVM-RBF | SVM-Polynomial |
|-----------------|------------|---------|----------------|
| India           | 4.9006     | 57.1999 | 114.7085       |
| China           | 29.2176    | 62.5550 | 265.2074       |
| Iran            | 36.0347    | 53.4743 | 37.3229        |
| South Korea     | 9.1170     | 52.5174 | 21.9167        |
| Canada          | 16.5645    | 17.8197 | 54.8594        |
| Indonesia       | 9.5794     | 54.5980 | 65.2664        |
| USA             | 14.7355    | 4.4472  | 37.3167        |
| Saud Arab       | 32.6173    | 55.2972 | 21.5335        |
| Japan           | 8.8881     | 5.3696  | 36.3962        |
| Brazil          | 5.5486     | 43.3320 | 8.2418         |
| South Africa    | 14.6854    | 39.4817 | 20.4860        |
| Mexico          | 5.6213     | 19.2069 | 33.2481        |
| Turkey          | 3.7920     | 47.7297 | 33.8005        |
| Australia       | 12.6662    | 33.7529 | 22.9515        |
| UK              | 11.9063    | 27.7873 | 241.0693       |
| Italy           | 19.1438    | 11.9933 | 21.6164        |
| France          | 10.1377    | 7.9741  | 35.7993        |
